# Supplementary material for: Continuous-flow synthesis of dimethyl fumarate: a powerful small molecule for the treatment of psoriasis and multiple sclerosis
Source: Royal Society of Chemistry journal article supplement (doi:10.1039/c9ra09119j), 2020-01-01

Supporting Information for:

# Continuous-Flow Synthesis of Dimethyl Fumarate: a Powerful Small Molecule on the Treatment of Psoriasis and Multiple Sclerosis

Marcelo T. Lima <sup>a,b</sup>, Fernanda G. Finelli<sup>b</sup>, Alline V. B. de Oliveira <sup>c</sup>, Vinicius Kartnaller<sup>c</sup>,  
João F. Cajaiba<sup>c</sup>, Raquel A. C. Leão <sup>a</sup>, Rodrigo O. M. A. de Souza <sup>a</sup>

a – Biocatalysis and Organic Synthesis Group, Chemistry Institute, Federal University of Rio de Janeiro, 21941909, Brazil;

b – Instituto de Pesquisa em Produtos Naturais, Federal University of Rio de Janeiro, 21941909, Brazil;

c- Núcleo de Desenvolvimento de Processos e Análises Químicas em Tempo Real (NQTR), Chemistry Institute, Federal University of Rio de Janeiro, 21941909, Brazil;

**Keywords:** continuous-flow, dimethyl fumarate, cascade reactions, api synthesis;

\*[souzarod21@gmail.com](mailto:souzarod21@gmail.com)

## CONTENTS ESPECTRAL DATA FOR COMPOUNDS:

|     |                                                                                  |       |
|-----|----------------------------------------------------------------------------------|-------|
|     | <b>Experimental Section</b> .....                                                | S1    |
| 1   | EXPERIMENTAL PROCEDURE .....                                                     | S2    |
| 1.1 | Batch synthesis of dimethyl fumarate from fumaric acid: .....                    | S2    |
| 1.2 | Batch synthesis of dimethyl fumarate from maleic anhydride: .....                | S2    |
| 2.  | STUDY OF OPTIMIZATION IN BATCH .....                                             | S3    |
| 2.1 | From the esterification of fumaric acid .....                                    | S3-S4 |
| 2.2 | Study of optimization from the esterification of maleic anhydride in batch ..... | S4-S5 |
| 3.  | CHROMATOGRAPHIC ANALYSIS .....                                                   | S5    |
| 3.1 | Esterification of fumaric acid .....                                             | S5    |
| 3.1 | Esterification of maleic anhydride .....                                         | S6    |
| 4.  | SPECTRAL DATA .....                                                              | S6    |
| 4.1 | <sup>1</sup> H-NMR spectra: Dimethyl fumarate .....                              | S6    |

## 1. EXPERIMENTAL SECTION

### 1.1 Batch synthesis of dimethyl fumarate from fumaric acid:

To a 125mL flask was added 5.0423 g (43.4 mmol) and 80 mL of methanol, and heated to 55 ° C. Then 0.587 mL of H<sub>2</sub>SO<sub>4</sub> was added, the mixture was stirred for 120 min. After this time, reaction was cooled to room temperature and allowed to crystallize under stirring for 8 h. The formed solid was filtered off and recrystallized with a 20 % methanol: water solution, filtered and dried at room temperature to give a crystalline solid in 83 % yield.

### 1.2 Batch synthesis of dimethyl fumarate from maleic anhydride:

To a 50 mL flask was added 10.0469 g (102.5 mmol) and 50 mL methanol, and heated to 40 ° C. Then 0.3130 g (4.0 mmol) of maleic anhydride was added under constant stirring. The conditions were maintained for 30 min. Following 0.815 mL H<sub>2</sub>SO<sub>4</sub> was added, and the temperature was raised to 55 °C, the mixture was stirred for 120 min. After that, was cooled at room temperature, crystallization go on under stirring for 8 h. The solid formed was filtered and recrystallized with a 20 % methanol : water solution, filtered and dried at room temperature to give a 65 % yield of crystalline solid.

## 2. STUDY OF OPTIMIZATION

### 2.1 From the esterification of fumaric acid in batch

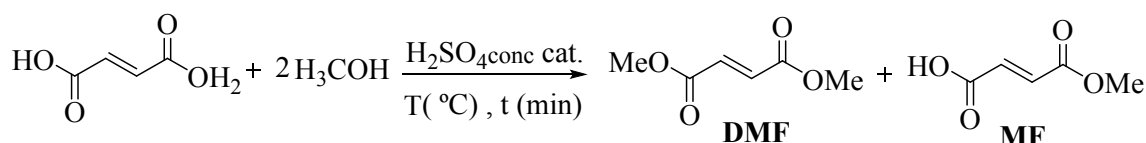

Below is presented the results of parameters optimization (temperature, amount of catalyst and substrate) from the esterification of fumaric acid:

**Table S1:** Results from the temperature study.

| T<br>t (min.) | 55 °C  |         | 45 °C  |         | 35 °C  |         |
|---------------|--------|---------|--------|---------|--------|---------|
|               | MF (%) | DMF (%) | MF (%) | DMF (%) | MF (%) | DMF (%) |
| 5             | 62.4   | 3.6     | 35.3   | 2.4     | 0      | 0       |
| 10            | 54.4   | 5.9     | 44.2   | 5.5     | 0      | 0       |
| 15            | 47.0   | 5.7     | 52.0   | 9.0     | 2.46   | 0       |
| 20            | 52.7   | 8.0     | 53.4   | 9.6     | 7.22   | 0       |
| 30            | 55.0   | 11.6    | 59.8   | 17.1    | 4.45   | 0       |

*Experimental Conditions:* Fumaric acid 0.81 M, 0.081 M of H<sub>2</sub>SO<sub>4conc.</sub> (25 mol%) in methanol, 30 min at 55 °C. *Analyze Conditions:* conversion calculated at GC-MS, oven programming, 60 °C for 1 min, heated for 7 °C/min until 170 °C and maintained 1 min.

**Table S2:** Results from the catalyst study.

| Cat. conc.<br>t (min.) | 5 % mol |         | 7 % mol |         | 10 % mol |         |
|------------------------|---------|---------|---------|---------|----------|---------|
|                        | MF (%)  | DMF (%) | MF (%)  | DMF (%) | MF (%)   | DMF (%) |
| 5                      | 34.9    | 2.2     | 33.8    | 2.5     | 28.8     | 3.1     |
| 10                     | 33.6    | 6.5     | 40.4    | 4.7     | 37.2     | 4.3     |
| 15                     | 41.5    | 5.5     | 46.2    | 8.1     | 44.0     | 7.2     |
| 20                     | 47.1    | 7.1     | 50.6    | 9.6     | 47.7     | 10.3    |
| 30                     | 51.1    | 10.3    | 59.1    | 15.0    | 56.3     | 15.1    |

*Experimental Conditions:* Fumaric acid 0.81 M, H<sub>2</sub>SO<sub>4conc.</sub> as catalyst in methanol, 30 min at 55 °C. *Analyze Conditions:* conversion calculated at GC-MS, oven programming, 60 °C for 1 min, heated for 7 °C/min until 170 °C and maintained 1 min.

**Table S3:** Results from the fumaric acid concentration study.

| Fumaric Ac.<br>Conc.<br>t (min.) | 54 mmol |         | 81 mmol |         |
|----------------------------------|---------|---------|---------|---------|
|                                  | MF (%)  | DMF (%) | MF (%)  | DMF (%) |
| 15                               | 39.0    | 60.3    | 27.7    | 72.4    |
| 30                               | 22.3    | 77.7    | 21.5    | 78.5    |
| 60                               | 11.8    | 88.1    | 13.2    | 86.8    |
| 90                               | 3.6     | 96.4    | 4.6     | 95.4    |

|     |     |      |     |      |
|-----|-----|------|-----|------|
| 120 | 2.8 | 97.2 | 2.0 | 98.0 |
| 150 | 0   | 100  | 0   | 100  |
| 180 | 0   | 100  | 0   | 100  |

*Experimental Conditions:* Fumaric acid, 10 mol % of H<sub>2</sub>SO<sub>4conc.</sub> as catalyst in methanol, 30 min at 55 °C. *Analyze Conditions:* conversion calculated at GC-MS, oven programming, 60°C for 1 min, heated for 7 °C/min until 170 °C and maintained 1 min.

## 2.2 Study of optimization from the esterification of maleic anhydride in batch

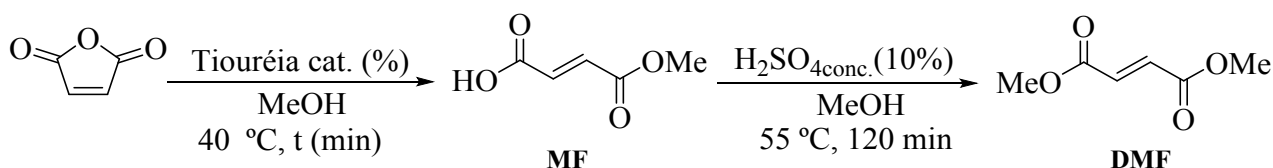

**Table S4:** Results from the time study.

| Time (min) | DMF (%) | MF (%) | Anhydride(%) |
|------------|---------|--------|--------------|
| 60         | 1.3     | 98.0   | 0.7          |
| 120        | 1.6     | 96.5   | 1.9          |
| 180        | 2.0     | 94.6   | 3.4          |
| 240        | 2.2     | 95.6   | 2.1          |
| 300        | 2.5     | 95.4   | 2.1          |
| 360        | 2.9     | 94.9   | 2.1          |

*Experimental Conditions:* Anhydride 2.0 M, 0.1 M of thiourea (5 mol%) in methanol, at 40 °C. *Analyze Conditions:* conversion calculated at GC-MS, oven programming, 60 °C for 1 min, heated for 15 °C/min until 118 °C, heated for 20 °C/min until 150 °C, heated for 15 °C/min until 180 °C and maintained 1 min.

**Table S5:** Results from the catalyst study with time variation.

| Cat.<br>Time (min) | 5%      |        |               | 10%     |        |               | 15%     |        |               |
|--------------------|---------|--------|---------------|---------|--------|---------------|---------|--------|---------------|
|                    | DMF (%) | MF (%) | Anhydride (%) | DMF (%) | MF (%) | Anhydride (%) | DMF (%) | MF (%) | Anhydride (%) |
| 30                 | 0.6     | 98.3   | 1.1           | 0.4     | 98.4   | 1.2           | 0.4     | 97.6   | 2.0           |
| 60                 | 0.6     | 98.3   | 1.1           | 0.4     | 98.4   | 1.3           | 0.4     | 97.7   | 1.9           |
| 75                 | 0.7     | 98.2   | 1.1           | 0.4     | 97.8   | 1.9           | 0.4     | 97.6   | 2.0           |
| 90                 | 0.7     | 98.1   | 1.2           | 0.4     | 97.6   | 2.0           | 0.4     | 97.7   | 1.9           |
| 120                | 0.8     | 98.6   | 0.7           | 0.4     | 97.8   | 1.7           | 0.4     | 97.4   | 2.1           |

*Experimental Conditions:* Anhydride 2.0 M, thiourea as catalyst in methanol, at 40 °C. *Analyze Conditions:* conversion calculated at GC-MS, oven programming, 60 °C for 1 min, heated for 15 °C/min until 118 °C, heated for 20 °C/min until 150 °C, heated for 15 °C/min until 180 °C and maintained 1 min.

**Table S6:** Results from the cascade reaction.

| Time (min) | DMF (%) | MF (%) | Anhydride (%) |
|------------|---------|--------|---------------|
| 30         | 0.2     | 98.4   | 1.4           |
| 90         | 95.0    | 3.7    | 0.0           |
| 150        | 98.6    | 0.9    | 0.0           |

*Experimental Conditions:* Anhydride 2.0 M, 0.1 M of thiourea (5 mol%) in methanol, at 40 °C, after 30 min the H<sub>2</sub>SO<sub>4</sub> was added and the temperature was raised to 55 °C. *Analyze Conditions:* conversion calculated at GC-MS; oven programming, 60 °C for 2 min, heated for 15 °C/min until 80 °C, heated for 10 °C/min until 135 °C, heated for 20 °C/min until 140 °C and maintained 1 min, heated for 20 °C/min until 180 °C and maintained 1 min.

### 3. CHOMATOGRAPHIC ANALYSIS

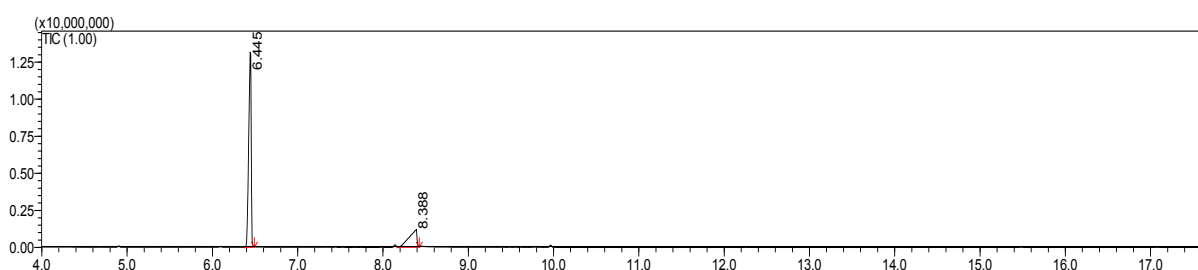

**Figure S1:** Chromatographic profile obtained by GC-MS after the optimized batch conditions. Retention time: 6.4 min –Dimethyl fumarate, 8.3 min – Methyl fumarate; *Experimental Conditions:* Fumaric acid 0.81 M, 10 mol% of H<sub>2</sub>SO<sub>4conc.</sub> in methanol, 2 h at 55 °C. *Analyze Conditions:* oven programming, 60 °C for 1 min, heated for 7 °C/min until 170 °C and maintained 1 min.

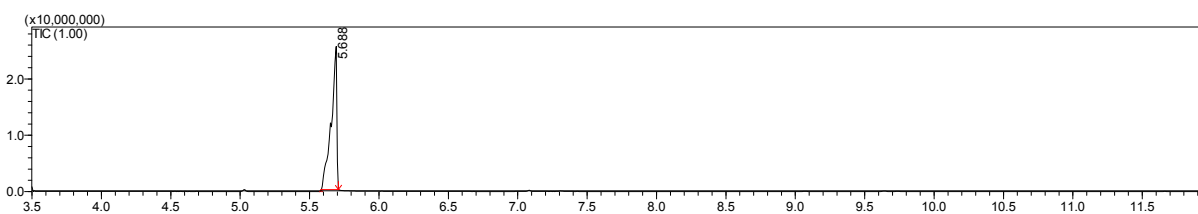

**Figure S2:** Chromatographic profile obtained by GC-MS after the optimized batch conditions for anhydride. Retention time: 6.4 min –Dimethyl fumarate; *Experimental Conditions:* Anhydride 2.0 M, 0.1 M of thiourea (5 mol%) thiourea in methanol, at 40 °C, after 30 min the H<sub>2</sub>SO<sub>4</sub> was added and the temperature was raised to 55°C. *Analyze Conditions:* conversion calculated at GC-MS; oven programming, 60 °C for 2 min, heated for 15 °C/min until 80 °C,

heated for 10 °C/min until 135 °C, heated for 20 °C/min until 140 °C and maintained 1 min, heated for 20 °C/min until 180 °C and maintained 1 min.

#### 4. ESPECTRAL DATA

##### 4.1 <sup>1</sup>H-NMR spectra: Dimethyl fumarate (DMF).

<sup>1</sup>H NMR (500 MHz, CDCl<sub>3</sub>) δ 6.82 (s, 1H), 3.77 (s, 3H).

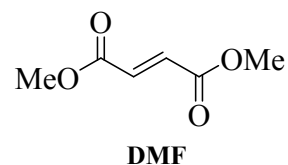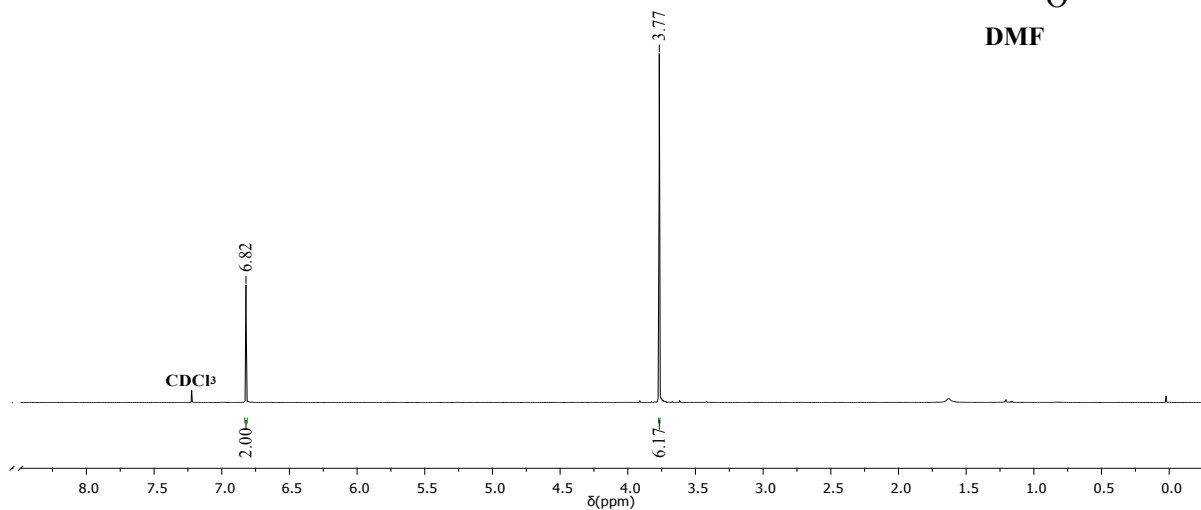

**Figure S3:** Recrystallized Dimethyl Fumarate (DMF).

#### 5. Pictures from the RGB system used for crystallization:

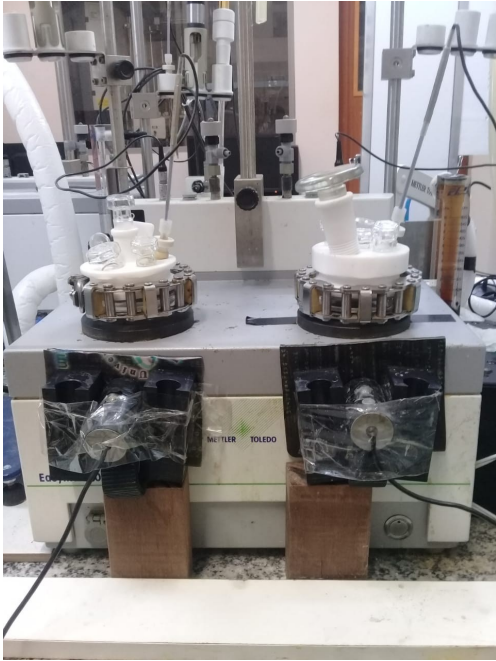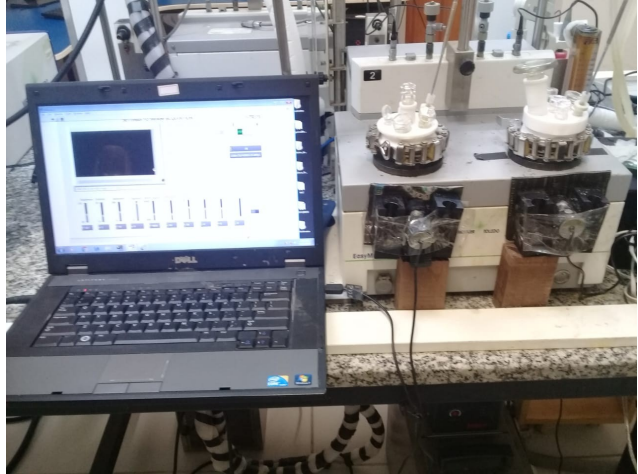

Supplement: c9ra09119j1.pdf [file c9ra09119j1.pdf]
